# Supplementary material for: Exposure to COVID-19-Related Information and its Association With Mental Health Problems in Thailand: Nationwide, Cross-sectional Survey Study
Source: J Med Internet Res. 2021 Feb 12;23(2):e25363. doi: 10.2196/25363 (PMC7886375; doi:10.2196/25363)
Supplement: Multimedia Appendix 5 [file jmir_v23i2e25363_app5.docx]

**Multimedia Appendix 5.** Sensitivity analysis.

**Table S1.** Mental Health Outcomes According to COVID-19-Related Information Exposure Duration: Multivariable Linear Regression Model†

| **COVID-19-Related Information Exposure Duration** | **Depression: Lower=Better** | | | **Anxiety: Lower=Better** | | | **Stress: Lower=Better** | | | **Insomnia: Lower=Better** | | |
| --- | --- | --- | --- | --- | --- | --- | --- | --- | --- | --- | --- | --- |
| **Mean (min-max)** | **Adjusted Difference (95% CI)** | ***P* Value** | **Mean (min-max)** | **Adjusted Difference (95% CI)** | ***P* Value** | **Mean (min-max)** | **Adjusted Difference (95% CI)** | ***P* Value** | **Mean (min-max)** | **Adjusted Difference (95% CI)** | ***P* Value** |
| <1 h/day | 7.6  (0-27) | Reference (1.00) |  | 4.2 (0-21) | Reference (1.00) |  | 16.9  (0-39) | Reference (1.00) |  | 8.2  (0-28) | Reference (1.00) |  |
| 1-2 h/day | 8.1  (0-27) | 0.39  (-0.14, 0.91) | 0.147 | 4.7 (0-21) | 0.77  (0.36, 1.18) | <0.001 | 17.4  (0-40) | 0.55  (0.01, 1.09) | 0.045 | 8.8  (0-28) | 0.25  (-0.26, 0.77) | 0.337 |
| ≥3 h/day | 8.8  (0-27) | 1.22  (0.59, 1.86) | <0.001 | 5.6 (0-21) | 1.70  (1.15, 2.25) | <0.001 | 18.2  (0-40) | 1.39  (0.74, 2.05) | <0.001 | 9.3  (0-25) | 1.06  (0.43, 1.69) | 0.001 |

Noted: the adjusted difference corresponding to 95% CIs are presented weighted according to the national population and internet users in Thailand.

†Adjusted for age, sex, marital status, education level, religion, occupation, region of residence, living status, reimbursement scheme, mental illness history, chronic non-communicable disease history, income loss, financial problems, confirmed cases in the community, working from home, quarantine status, fear of COVID-19, and resilient coping.

Abbreviations: CI, confidence interval; COVID-19, coronavirus disease-2019; GAD-7, Generalized Anxiety Disorder-7; ISI, Insomnia Severity Index; OR, odds ratio; PHQ-9, Patient Health Questionnaire-9; PSS-10, Perceived Stress Scale-10.

**Table S2.** Multivariable Ordinal Logistic Regression Model Results of COVID-19-Related Information Exposure Duration and the Severity of Mental Health Problems†

| **COVID-19-Related Information Exposure Duration** | **Depression: PHQ-9** | | **Anxiety: GAD-7** | | | **Stress: PSS-10** | | | **Insomnia: ISI** | |
| --- | --- | --- | --- | --- | --- | --- | --- | --- | --- | --- |
| **Estimate Adjusted OR (95% CI)** | ***P* Value** | **Estimate Adjusted OR****(95% CI)** | ***P* Value** | **Estimate Adjusted OR****(95% CI)** | | ***P* Value** | **Estimate Adjusted OR****(95% CI)** | | ***P* Value** |
| <1 h/day | Reference (1.00) |  | Reference (1.00) |  | Reference (1.00) | |  | Reference (1.00) | |  |
| 1-2 h/day | 1.13  (0.91 – 1.39) | 0.259 | 1.34  (1.09 – 1.66) | 0.005 | 1.09  (0.88 – 1.35) | | 0.423 | 1.10  (0.90 – 1.34) | | 0.362 |
| ≥3 h/day | 1.49  (1.15 – 1.92) | 0.002 | 2.19  (1.70 – 2.84) | <0.001 | 1.26  (0.97 – 1.62) | | 0.076 | 1.49  (1.18 – 1.88) | | 0.001 |

Noted: ordinal logistic regression using no/minimal mental health as the reference group; and the adjusted difference corresponding to 95% CIs are presented weighted according to the national population and internet users in Thailand.

†Adjusted for age, sex, marital status, education level, religion, occupation, region of residence, living status, reimbursement scheme, mental illness history, chronic non-communicable diseases history, income loss, financial problems, confirmed cases in the community, working from home, quarantine status, fear of COVID-19, and resilient coping.

Abbreviations: CI, confidence interval; COVID-19, coronavirus disease-2019; GAD-7, Generalized Anxiety Disorder-7; ISI, Insomnia Severity Index; OR, odds ratio; PHQ-9, Patient Health Questionnaire-9; PSS-10, Perceived Stress Scale-10.
